# Supplementary material for: The Pathogenic Effects of Fusobacterium nucleatum on the Proliferation, Osteogenic Differentiation, and Transcriptome of Osteoblasts
Source: Front Cell Dev Biol. 2020 Sep 11;8:807. doi: 10.3389/fcell.2020.00807 (PMC7517582; doi:10.3389/fcell.2020.00807)
Supplement: TABLE S8 — KEGG enrichment analysis results of 133 dynamic significant osteogenic-related DEGs. [file Table_8.XLS]

## Sheet: Sheet1
#term ID	term description	observed gene count	background gene count	false discovery rate	matching proteins in your network (IDs)	matching proteins in your network (labels)
rno05200	Pathways in cancer	17	501	1.45e-06	ENSRNOP00000003567,ENSRNOP00000004699,ENSRNOP00000005995,ENSRNOP00000011925,ENSRNOP00000013516,ENSRNOP00000013694,ENSRNOP00000018877,ENSRNOP00000023144,ENSRNOP00000023965,ENSRNOP00000025718,ENSRNOP00000026235,ENSRNOP00000026287,ENSRNOP00000026637,ENSRNOP00000028904,ENSRNOP00000042230,ENSRNOP00000047037,ENSRNOP00000047702	Bmp2,Col4a6,Ets1,Fgfr3,Hif1a,Igf1,Igf2,Il6st,Lef1,Mmp9,Nfkb2,Notch2,Prkca,Ptch1,Ptgs2,Tgfb3,Vegfa
rno05205	Proteoglycans in cancer	11	188	1.45e-06	ENSRNOP00000004699,ENSRNOP00000005995,ENSRNOP00000009000,ENSRNOP00000023965,ENSRNOP00000026287,ENSRNOP00000026637,ENSRNOP00000027597,ENSRNOP00000042230,ENSRNOP00000043344,ENSRNOP00000047037,ENSRNOP00000066041	Cd44,Gpc3,Hif1a,Igf1,Igf2,Mmp9,Prkca,Ptch1,Thbs1,Twist2,Vegfa
rno05206	MicroRNAs in cancer	10	139	1.45e-06	ENSRNOP00000003567,ENSRNOP00000004699,ENSRNOP00000009000,ENSRNOP00000023144,ENSRNOP00000023965,ENSRNOP00000025718,ENSRNOP00000026637,ENSRNOP00000040229,ENSRNOP00000061222,ENSRNOP00000066041	Cd44,Cyp1b1,Fgfr3,Mmp16,Mmp9,Notch2,Prkca,Ptgs2,Thbs1,Vegfa
rno04151	PI3K-Akt signaling pathway	14	326	1.45e-06	ENSRNOP00000001679,ENSRNOP00000001695,ENSRNOP00000003703,ENSRNOP00000004699,ENSRNOP00000005995,ENSRNOP00000007771,ENSRNOP00000023144,ENSRNOP00000025221,ENSRNOP00000026637,ENSRNOP00000047037,ENSRNOP00000047702,ENSRNOP00000062358,ENSRNOP00000066041,ENSRNOP00000067037	Areg,Col4a6,Col6a1,Col6a2,Comp,Creb3l1,Csf1,Fgfr3,Igf1,Igf2,Prkca,Spp1,Thbs1,Vegfa
rno04060	Cytokine-cytokine receptor interaction	11	217	3.07e-06	ENSRNOP00000011344,ENSRNOP00000013210,ENSRNOP00000013516,ENSRNOP00000015139,ENSRNOP00000016717,ENSRNOP00000018877,ENSRNOP00000021963,ENSRNOP00000022478,ENSRNOP00000025221,ENSRNOP00000026637,ENSRNOP00000028904	Bmp2,Bmpr1b,Ccl3,Csf1,Il17f,Il6st,Tgfb3,Tnfrsf11b,Tnfrsf1b,Tnfsf11,Vegfa
rno04974	Protein digestion and absorption	8	88	3.07e-06	ENSRNOP00000001679,ENSRNOP00000001695,ENSRNOP00000005073,ENSRNOP00000010333,ENSRNOP00000017217,ENSRNOP00000030301,ENSRNOP00000047702,ENSRNOP00000047962	Col15a1,Col18a1,Col27a1,Col4a6,Col5a2,Col6a1,Col6a2,Eln
rno04010	MAPK signaling pathway	12	287	4.39e-06	ENSRNOP00000003630,ENSRNOP00000003703,ENSRNOP00000004699,ENSRNOP00000005995,ENSRNOP00000013516,ENSRNOP00000023144,ENSRNOP00000025221,ENSRNOP00000026235,ENSRNOP00000026637,ENSRNOP00000047037,ENSRNOP00000055183,ENSRNOP00000068307	Areg,Csf1,Fgfr3,Igf1,Igf2,Mef2c,Nfatc1,Nfkb2,Pla2g4a,Prkca,Tgfb3,Vegfa
rno04512	ECM-receptor interaction	7	73	9.09e-06	ENSRNOP00000001679,ENSRNOP00000001695,ENSRNOP00000009000,ENSRNOP00000047702,ENSRNOP00000062358,ENSRNOP00000066041,ENSRNOP00000067037	Cd44,Col4a6,Col6a1,Col6a2,Comp,Spp1,Thbs1
rno04350	TGF-beta signaling pathway	7	83	1.81e-05	ENSRNOP00000002394,ENSRNOP00000010266,ENSRNOP00000013516,ENSRNOP00000018359,ENSRNOP00000021963,ENSRNOP00000028904,ENSRNOP00000066041	Bmp2,Bmp6,Bmpr1b,Chrd,Gdf6,Tgfb3,Thbs1
rno04510	Focal adhesion	9	189	4.12e-05	ENSRNOP00000001679,ENSRNOP00000001695,ENSRNOP00000004699,ENSRNOP00000005995,ENSRNOP00000026637,ENSRNOP00000047702,ENSRNOP00000062358,ENSRNOP00000066041,ENSRNOP00000067037	Col4a6,Col6a1,Col6a2,Comp,Igf1,Prkca,Spp1,Thbs1,Vegfa
rno05165	Human papillomavirus infection	11	317	5.35e-05	ENSRNOP00000001679,ENSRNOP00000001695,ENSRNOP00000003567,ENSRNOP00000007771,ENSRNOP00000025718,ENSRNOP00000026637,ENSRNOP00000047702,ENSRNOP00000062358,ENSRNOP00000065485,ENSRNOP00000066041,ENSRNOP00000067037	Col4a6,Col6a1,Col6a2,Comp,Creb3l1,Notch2,Ptgs2,Rbpj,Spp1,Thbs1,Vegfa
rno04014	Ras signaling pathway	9	227	0.00014	ENSRNOP00000003630,ENSRNOP00000004699,ENSRNOP00000005995,ENSRNOP00000011925,ENSRNOP00000022715,ENSRNOP00000023144,ENSRNOP00000025221,ENSRNOP00000026637,ENSRNOP00000047037	Csf1,Ets1,Fgfr3,Igf1,Igf2,Pla2g4a,Pla2g5,Prkca,Vegfa
rno05161	Hepatitis B	7	128	0.00019	ENSRNOP00000000792,ENSRNOP00000004699,ENSRNOP00000007771,ENSRNOP00000013516,ENSRNOP00000023965,ENSRNOP00000031615,ENSRNOP00000055183	Creb3l1,Egr2,Mmp9,Nfatc1,Prkca,Ptk2b,Tgfb3
rno04913	Ovarian steroidogenesis	5	51	0.00023	ENSRNOP00000003567,ENSRNOP00000003630,ENSRNOP00000005995,ENSRNOP00000018359,ENSRNOP00000061222	Bmp6,Cyp1b1,Igf1,Pla2g4a,Ptgs2
rno04390	Hippo signaling pathway	7	149	0.00041	ENSRNOP00000003703,ENSRNOP00000010266,ENSRNOP00000013516,ENSRNOP00000013694,ENSRNOP00000018359,ENSRNOP00000021963,ENSRNOP00000028904	Areg,Bmp2,Bmp6,Bmpr1b,Gdf6,Lef1,Tgfb3
rno04380	Osteoclast differentiation	6	116	0.00086	ENSRNOP00000011344,ENSRNOP00000013210,ENSRNOP00000025221,ENSRNOP00000026235,ENSRNOP00000028284,ENSRNOP00000055183	Csf1,Nfatc1,Nfkb2,Tnfrsf11b,Tnfsf11,Tyrobp
rno01521	EGFR tyrosine kinase inhibitor resistance	5	78	0.0012	ENSRNOP00000004699,ENSRNOP00000005995,ENSRNOP00000023144,ENSRNOP00000024677,ENSRNOP00000026637	Fgfr3,Gas6,Igf1,Prkca,Vegfa
rno05219	Bladder cancer	4	39	0.0012	ENSRNOP00000023144,ENSRNOP00000023965,ENSRNOP00000026637,ENSRNOP00000066041	Fgfr3,Mmp9,Thbs1,Vegfa
rno05323	Rheumatoid arthritis	5	82	0.0014	ENSRNOP00000013210,ENSRNOP00000013516,ENSRNOP00000015139,ENSRNOP00000025221,ENSRNOP00000026637	Ccl3,Csf1,Tgfb3,Tnfsf11,Vegfa
rno04933	AGE-RAGE signaling pathway in diabetic complications	5	97	0.0028	ENSRNOP00000004699,ENSRNOP00000013516,ENSRNOP00000026637,ENSRNOP00000047702,ENSRNOP00000055183	Col4a6,Nfatc1,Prkca,Tgfb3,Vegfa
rno04066	HIF-1 signaling pathway	5	99	0.0029	ENSRNOP00000004699,ENSRNOP00000005995,ENSRNOP00000013745,ENSRNOP00000026637,ENSRNOP00000042230	Hif1a,Igf1,Prkca,Timp1,Vegfa
rno04370	VEGF signaling pathway	4	56	0.0033	ENSRNOP00000003567,ENSRNOP00000003630,ENSRNOP00000004699,ENSRNOP00000026637	Pla2g4a,Prkca,Ptgs2,Vegfa
rno04668	TNF signaling pathway	5	105	0.0035	ENSRNOP00000003567,ENSRNOP00000007771,ENSRNOP00000022478,ENSRNOP00000023965,ENSRNOP00000025221	Creb3l1,Csf1,Mmp9,Ptgs2,Tnfrsf1b
rno05211	Renal cell carcinoma	4	67	0.0057	ENSRNOP00000011925,ENSRNOP00000013516,ENSRNOP00000026637,ENSRNOP00000042230	Ets1,Hif1a,Tgfb3,Vegfa
rno04926	Relaxin signaling pathway	5	122	0.0062	ENSRNOP00000004699,ENSRNOP00000007771,ENSRNOP00000023965,ENSRNOP00000026637,ENSRNOP00000047702	Col4a6,Creb3l1,Mmp9,Prkca,Vegfa
rno05203	Viral carcinogenesis	6	195	0.0077	ENSRNOP00000000792,ENSRNOP00000007771,ENSRNOP00000018877,ENSRNOP00000025857,ENSRNOP00000026235,ENSRNOP00000065485	Creb3l1,Egr2,Gsn,Il6st,Nfkb2,Rbpj
rno04015	Rap1 signaling pathway	6	200	0.0084	ENSRNOP00000004699,ENSRNOP00000005995,ENSRNOP00000023144,ENSRNOP00000025221,ENSRNOP00000026637,ENSRNOP00000066041	Csf1,Fgfr3,Igf1,Prkca,Thbs1,Vegfa
rno04921	Oxytocin signaling pathway	5	142	0.0105	ENSRNOP00000003567,ENSRNOP00000003630,ENSRNOP00000004699,ENSRNOP00000055183,ENSRNOP00000068307	Mef2c,Nfatc1,Pla2g4a,Prkca,Ptgs2
rno05224	Breast cancer	5	144	0.0108	ENSRNOP00000005995,ENSRNOP00000013210,ENSRNOP00000013694,ENSRNOP00000025718,ENSRNOP00000026235	Igf1,Lef1,Nfkb2,Notch2,Tnfsf11
rno04650	Natural killer cell mediated cytotoxicity	4	88	0.012	ENSRNOP00000004699,ENSRNOP00000028284,ENSRNOP00000031615,ENSRNOP00000055183	Nfatc1,Prkca,Ptk2b,Tyrobp
rno05215	Prostate cancer	4	94	0.0146	ENSRNOP00000005995,ENSRNOP00000007771,ENSRNOP00000013694,ENSRNOP00000023965	Creb3l1,Igf1,Lef1,Mmp9
rno00565	Ether lipid metabolism	3	45	0.0151	ENSRNOP00000003630,ENSRNOP00000022715,ENSRNOP00000031958	Pla2g4a,Pla2g5,Pla2g7
rno04659	Th17 cell differentiation	4	101	0.0176	ENSRNOP00000016717,ENSRNOP00000018877,ENSRNOP00000042230,ENSRNOP00000055183	Hif1a,Il17f,Il6st,Nfatc1
rno04750	Inflammatory mediator regulation of TRP channels	4	101	0.0176	ENSRNOP00000003630,ENSRNOP00000004699,ENSRNOP00000005995,ENSRNOP00000026115	Igf1,P2ry2,Pla2g4a,Prkca
rno05144	Malaria	3	51	0.0193	ENSRNOP00000013516,ENSRNOP00000066041,ENSRNOP00000067037	Comp,Tgfb3,Thbs1
rno05167	Kaposi's sarcoma-associated herpesvirus infection	5	184	0.0242	ENSRNOP00000003567,ENSRNOP00000018877,ENSRNOP00000026637,ENSRNOP00000042230,ENSRNOP00000055183	Hif1a,Il6st,Nfatc1,Ptgs2,Vegfa
rno04270	Vascular smooth muscle contraction	4	115	0.0245	ENSRNOP00000003630,ENSRNOP00000004699,ENSRNOP00000022715,ENSRNOP00000043197	Myh11,Pla2g4a,Pla2g5,Prkca
rno04730	Long-term depression	3	58	0.025	ENSRNOP00000003630,ENSRNOP00000004699,ENSRNOP00000005995	Igf1,Pla2g4a,Prkca
rno05217	Basal cell carcinoma	3	60	0.0267	ENSRNOP00000013694,ENSRNOP00000026287,ENSRNOP00000028904	Bmp2,Lef1,Ptch1
rno05321	Inflammatory bowel disease (IBD)	3	61	0.0272	ENSRNOP00000013516,ENSRNOP00000016717,ENSRNOP00000055183	Il17f,Nfatc1,Tgfb3
rno00532	Glycosaminoglycan biosynthesis - chondroitin sulfate / dermatan sulfate	2	20	0.031	ENSRNOP00000012017,ENSRNOP00000025008	Chst11,Xylt1
rno04550	Signaling pathways regulating pluripotency of stem cells	4	132	0.0343	ENSRNOP00000005995,ENSRNOP00000018877,ENSRNOP00000021963,ENSRNOP00000023144	Bmpr1b,Fgfr3,Igf1,Il6st
rno05418	Fluid shear stress and atherosclerosis	4	135	0.0362	ENSRNOP00000021963,ENSRNOP00000023965,ENSRNOP00000026637,ENSRNOP00000068307	Bmpr1b,Mef2c,Mmp9,Vegfa
rno04310	Wnt signaling pathway	4	137	0.0371	ENSRNOP00000004699,ENSRNOP00000012659,ENSRNOP00000013694,ENSRNOP00000055183	Lef1,Nfatc1,Prkca,Sfrp2
rno00590	Arachidonic acid metabolism	3	72	0.0374	ENSRNOP00000003567,ENSRNOP00000003630,ENSRNOP00000022715	Pla2g4a,Pla2g5,Ptgs2
rno00592	alpha-Linolenic acid metabolism	2	24	0.0383	ENSRNOP00000003630,ENSRNOP00000022715	Pla2g4a,Pla2g5
